# Supplementary material for: Lactobacillus rhamnosus Attenuates Cisplatin-Induced Intestinal Mucositis in Mice via Modulating the Gut Microbiota and Improving Intestinal Inflammation
Source: MDPI journal article supplement (doi:10.3390/pathogens12111340), 2023-11-11
Supplement: s1 [file s1]

Supplementary Materials:

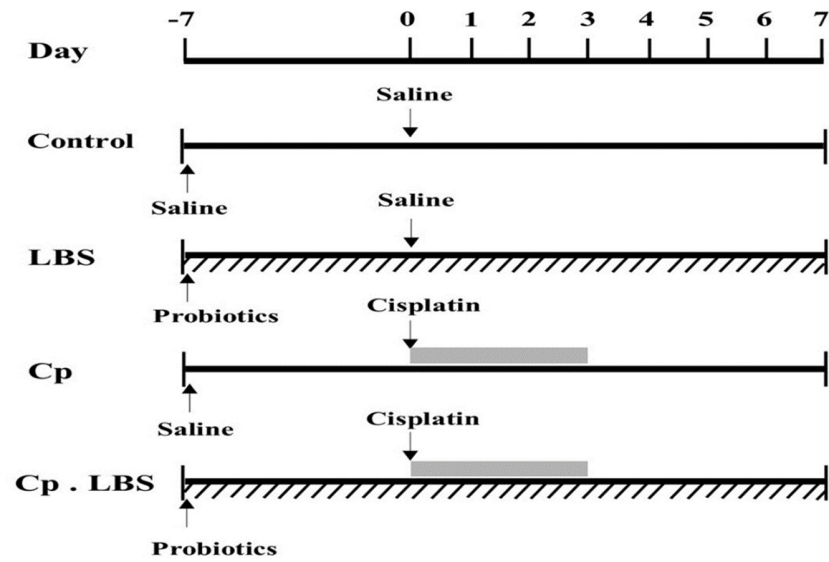

**Figure S1:** Animal experimental design. Animals were divided into four groups: control, LBS, CP, and CP.LBS. *Lactobacillus rhamnosus* LBS were given using oral gavage to LBS and CP.LBS group, Intestinal mucositis was induced in CP and CP.LBS group by intraperitoneal injection of cisplatin.
